# Supplementary material for: Synthesis and catalytic application of aluminium anilido-pyrazolate complexes
Source: Royal Society of Chemistry journal article supplement (doi:10.1039/b905394h), 2009-01-01
Supplement: b905394h.pdf [file b905394h.pdf]

Supporting Information for:

**Synthesis and Catalytic Application of Aluminium Anilido-Pyrazolate  
Complexes**

Kuo-Fu Peng and Chi-Tien Chen\*

*Department of Chemistry, National Chung Hsing University, Taichung 402, Taiwan*

Reactions of aluminium anilido-pyrazolate complexes **1-4** with 2 equiv. benzyl alcohol at room temperature within 5 minutes.

### Experimental procedures

Typically, prescribed amount of catalyst (0.028 mmol; 0.0082 g for **1**, 0.0093 g for **2**, 0.0090 g for **3** and 0.0095 g for **4**) in a flask was added 3.33 mL dried toluene (containing 0.056 mmol benzyl alcohol). The reaction mixture was stirred at room temperature for 5 minutes. All the volatiles were pumped off and part of the resulting solid was dissolved in  $C_6D_6$  for  $^1H$  NMR studies.

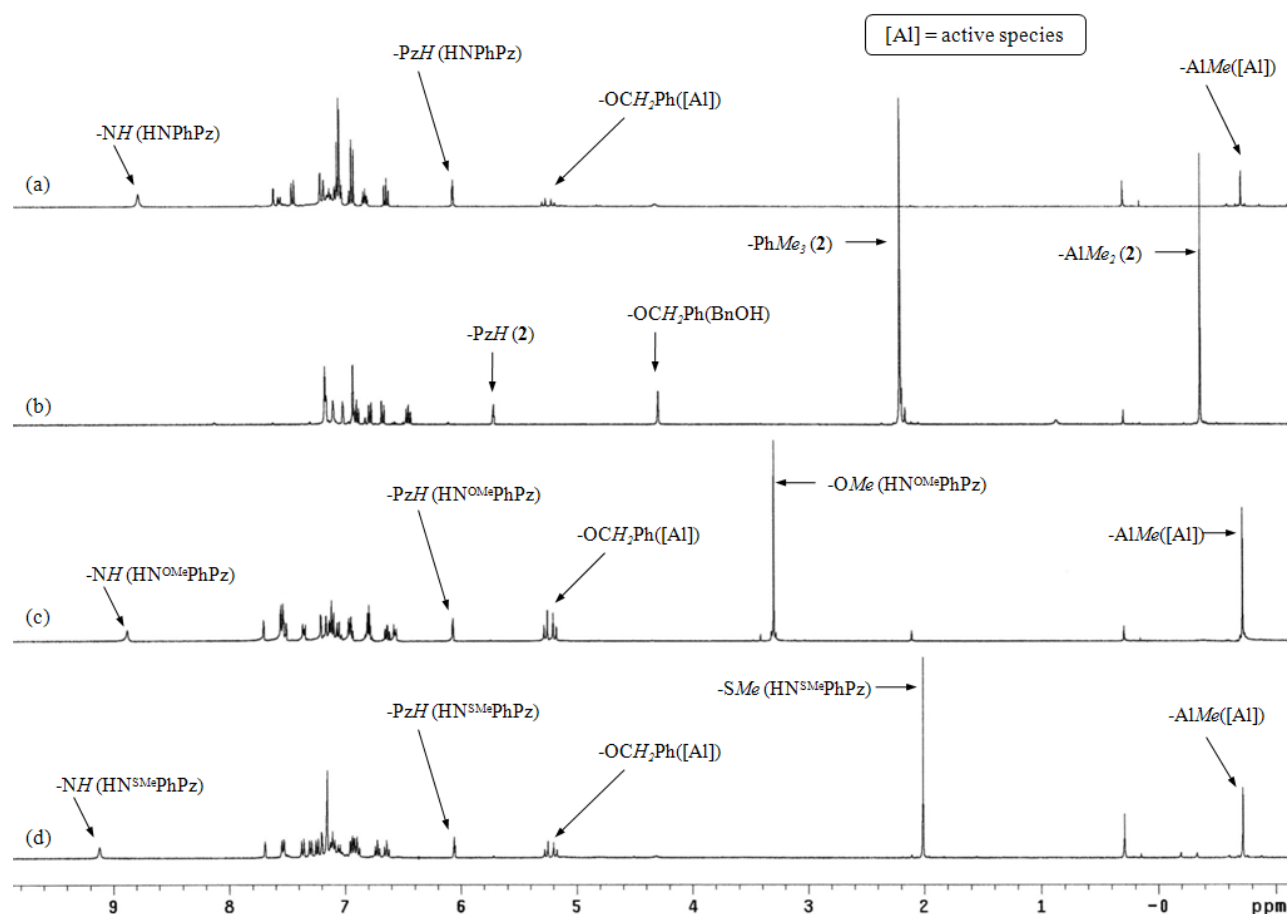

**Fig. S1**  $^1H$  NMR spectra for the reactions of aluminium anilido-pyrazolate complexes (**1-4**) with two equivalents of benzyl alcohol at room temperature after 5 minutes. (a) for **1** + 2BnOH; (b) for **2** + 2BnOH; (c) for **3** + 2BnOH; (d) for **4** + 2BnOH.
